# Supplementary material for: The shapes of elongating gastruloids are consistent with convergent extension driven by a combination of active cell crawling and differential adhesion
Source: PubMed Central journal article supplement (PMC10866519; doi:10.1371/journal.pcbi.1011825), 2024-02-02

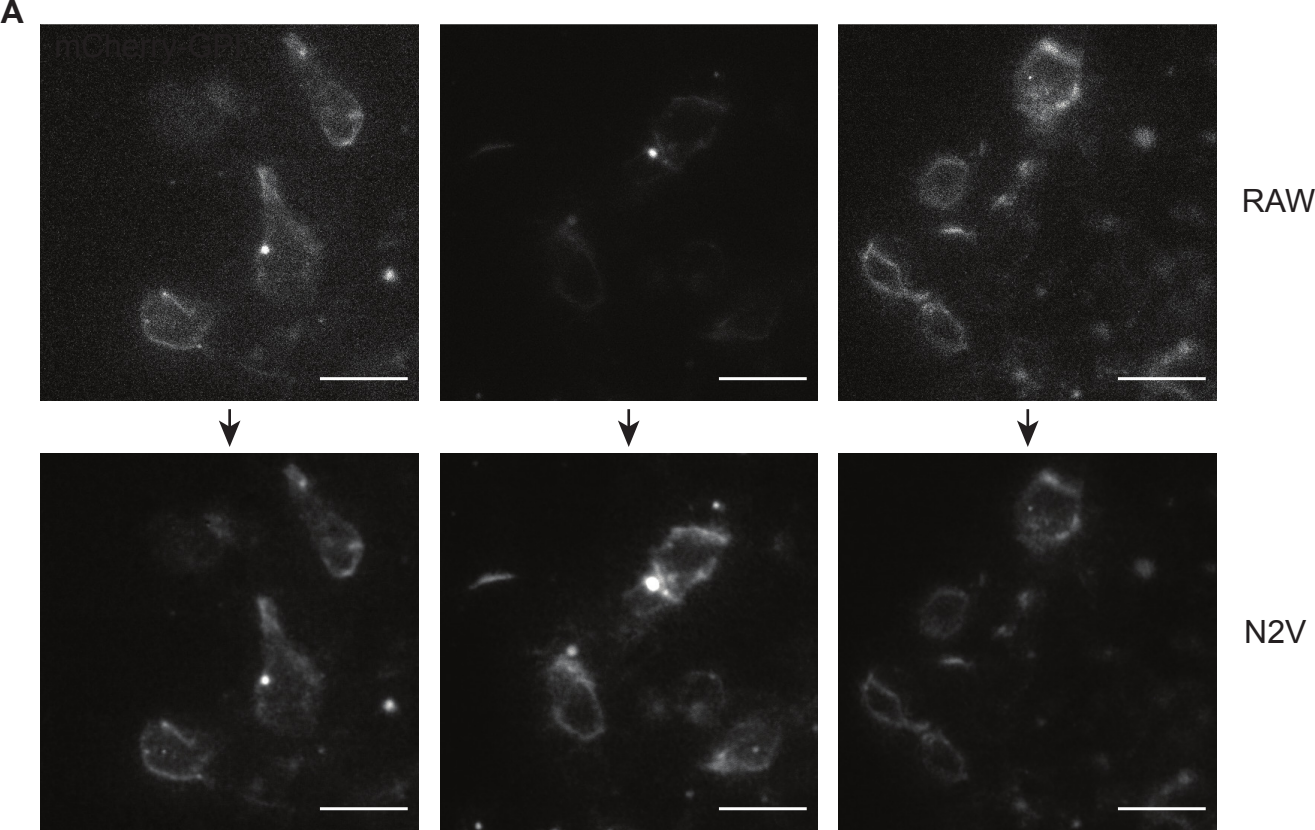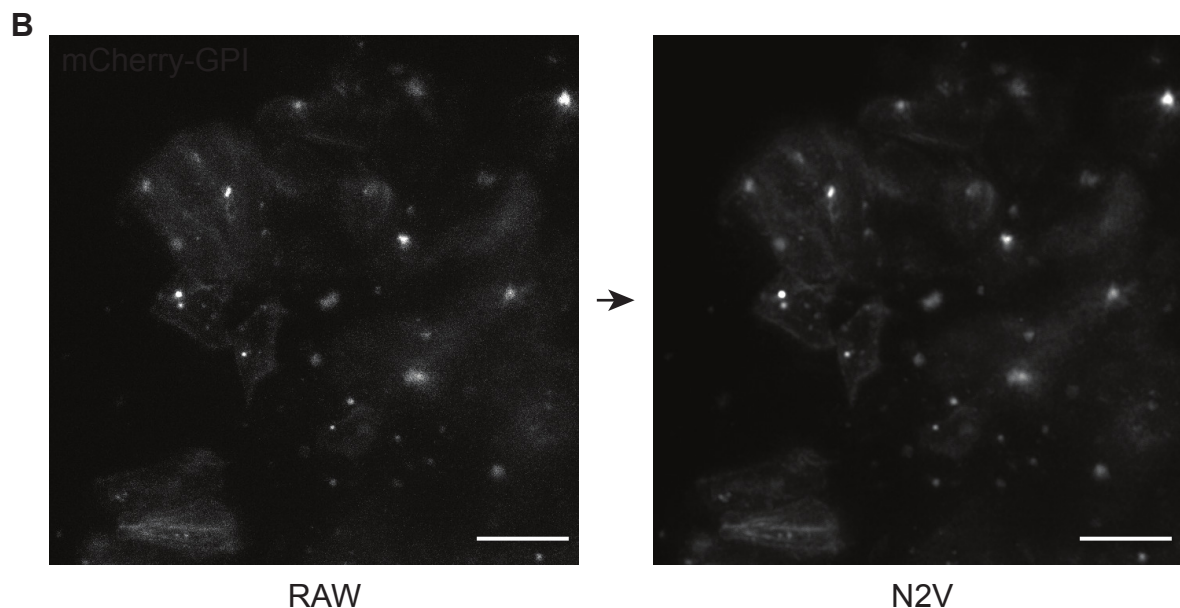

Supplement: pcbi.1011825.s001.pdf [file pcbi.1011825.s001.pdf]
