# Supplementary material for: The shapes of elongating gastruloids are consistent with convergent extension driven by a combination of active cell crawling and differential adhesion
Source: PubMed Central journal article supplement (PMC10866519; doi:10.1371/journal.pcbi.1011825), 2024-02-02
Supplement: pcbi.1011825.s009.pdf [file pcbi.1011825.s009.pdf]

A

"Yellow-yellow" pulling

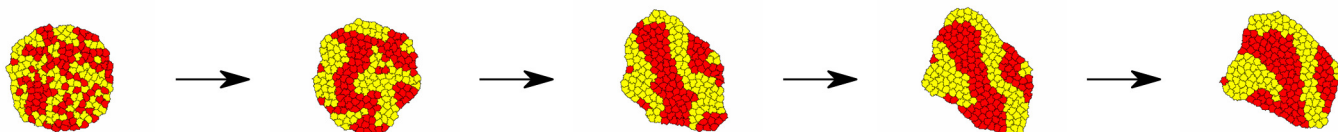

B

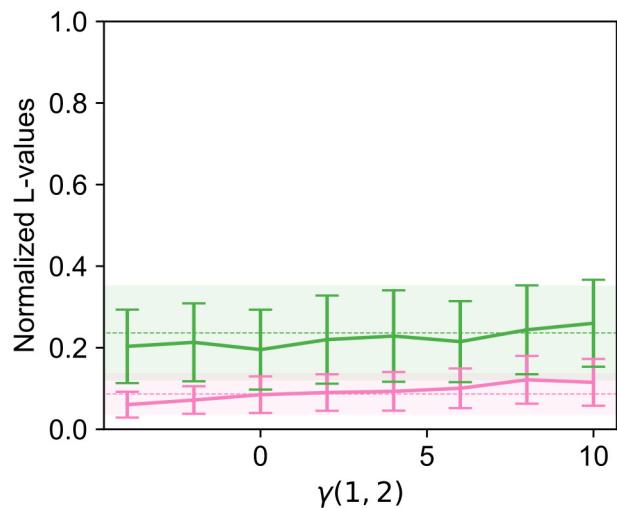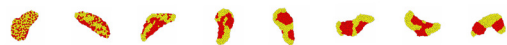

C

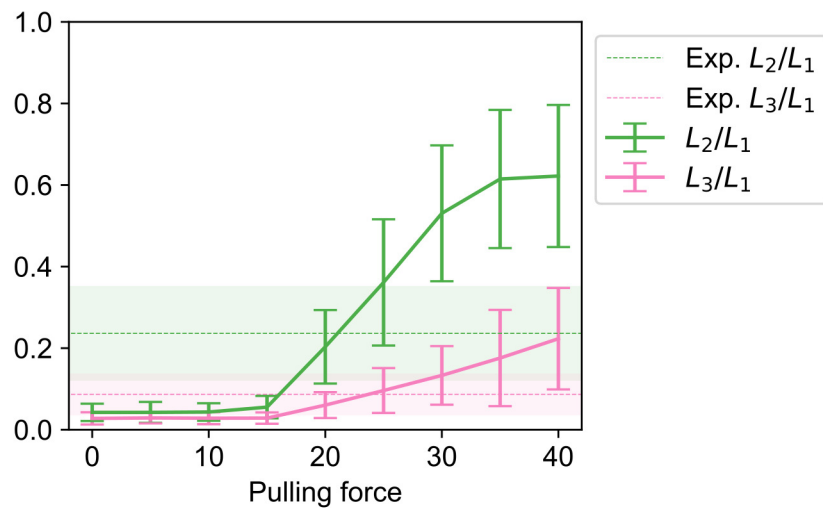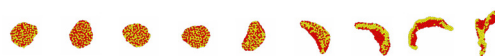

D

• Simulations      • 96 h gastruloids

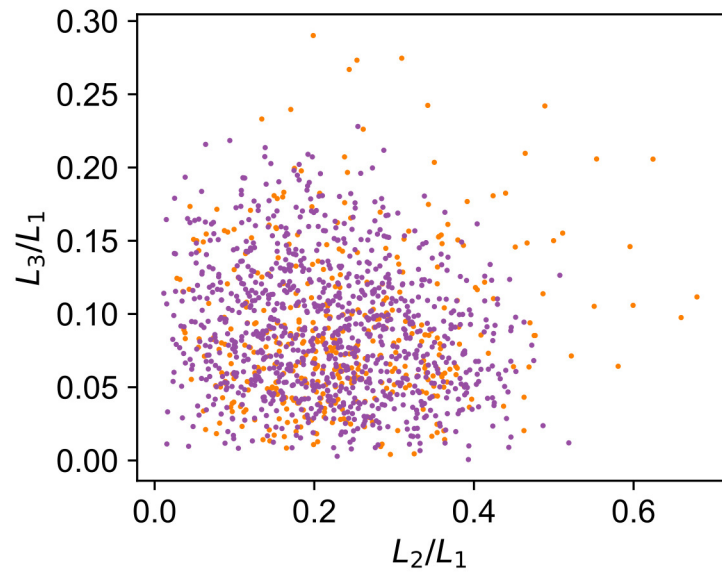

E

$L_2 / L_1 = 0.385$   
 $L_3 / L_1 = 0.149$

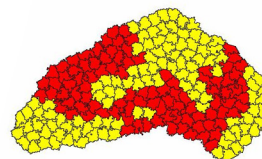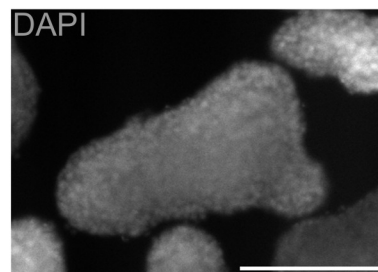

$L_2 / L_1 = 0.380$   
 $L_3 / L_1 = 0.151$
